# Supplementary material for: A Systematic Investigation of Lipid Transfer Proteins Involved in Male Fertility and Other Biological Processes in Maize
Source: MDPI journal article supplement (doi:10.3390/ijms24021660), 2023-01-14
Supplement: s1 [file s1]

## Supplementary Materials:

*Article*

# A Systematic Investigation of Lipid Transfer Proteins Involved in Male Fertility and Other Biological Processes in Maize

Chaowei Fang <sup>†</sup>, Suowei Wu <sup>†</sup>, Ziwen Li, Shuangshuang Pan, Yuru Wu, Xueli An, Yan Long, Xun Wei <sup>\*</sup>  
and Xiangyuan Wan <sup>\*</sup>

Zhongzhi International Institute of Agricultural Biosciences, Research Center of Biology and Agriculture, School of Chemistry and Biological Engineering,  
University of Science and Technology Beijing (USTB), Beijing 100096, China

<sup>\*</sup> Correspondence: weixun@ustb.edu.cn (X.W.); wanxiangyuan@ustb.edu.cn (X.W.);

Tel.: +86-(189)-1087-6260 (X.W.); +86-(186)-0056-1850 (X.W.)

<sup>†</sup> These authors contributed equally to this work.

**Table S1.** Information of 65 maize *LTP* genes.

| Name       | Gene ID (B73 V3) | Gene ID (B73 V4) | Synonyms in MaizeGDB | Chr. | Physical locus in B73 genome V4 | Physical locus in B73 genome V5 | Length (aa) | Theoretical pI | Predicted subcellular localization |
|------------|------------------|------------------|----------------------|------|---------------------------------|---------------------------------|-------------|----------------|------------------------------------|
| Type 1     |                  |                  |                      |      |                                 |                                 |             |                |                                    |
| ZmLTP1.1   | GRMZM2G126397    | Zm00001d043049   | plt3                 | 3    | 187418004..187422004            | 189563998..189568057            | 123         | 9.38           | Cell membrane, Cell wall           |
| ZmLTP1.2-1 | GRMZM2G010868    | Zm00001d044686   | plt2                 | 3    | 234928537..234931896            | 236775414..236779439            | 123         | 9.38           | Cytoplasm                          |
| ZmLTP1.2-2 |                  |                  |                      |      |                                 | 236775430..236779315            | 125         | 7.17           | Cell membrane, Cell wall           |
| ZmLTP1.3-1 | GRMZM2G107839    | Zm00001d044685   | -                    | 3    | 234863389..234868848            | 236712251..236716177            | 121         | 9.27           | Cell wall                          |
| ZmLTP1.3-2 |                  |                  |                      |      |                                 | 236712397..236716333            | 123         | 9.54           | Nucleus                            |
| ZmLTP1.4   | GRMZM2G096234    | Zm00001d008950   | -                    | 8    | 26734011..26737786              | 26586162..26590124              | 170         | 11.22          | Cell wall                          |
| ZmLTP1.5   | GRMZM2G025026    | Zm00001d046158   | -                    | 9    | 68299557..68302910              | 70375078..70379060              | 126         | 6.01           | Cell wall                          |
| ZmLTP1.6   | GRMZM2G101958    | Zm00001d023343   | plt1                 | 10   | 3823249..3827245                | 3757633..3761629                | 119         | 4.69           | Cell membrane, Cell wall           |
| ZmLTP1.7   | GRMZM5G898755    | Zm00001d023344   | -                    | 10   | 3838740..3856748                | 3786912..3791169                | 118         | 9.08           | Cell membrane                      |
| ZmLTP1.8-1 | GRMZM2G439268    | Zm00001d024710   | -                    | 10   | 84545407..84555133              | 86312524..86323137              | 175         | 8.78           | Cell wall                          |
| ZmLTP1.8-2 |                  |                  |                      |      |                                 | 86312892..86322593              | 135         | 8.40           | Nucleus                            |
| Type 2     |                  |                  |                      |      |                                 |                                 |             |                |                                    |
| ZmLTP2.1   | GRMZM2G137329    | Zm00001d027332   | -                    | 1    | 2991511..2995234                | 3084661..3088276                | 98          | 9.25           | Cell membrane                      |
| ZmLTP2.2   | GRMZM2G081464    | Zm00001d007299   | -                    | 2    | 227229498..227232995            | 227203121..227206602            | 98          | 9.25           | Cell membrane                      |
| ZmLTP2.3   | GRMZM2G406552    | Zm00001d052759   | -                    | 4    | 199956827..199960120            | 201803358..201806936            | 99          | 9.12           | Cell membrane                      |
| ZmLTP2.4   | GRMZM2G387360    | Zm00001d013907   | -                    | 5    | 24371450..24374740              | 24780624..24784315              | 97          | 8.86           | Cell membrane                      |
| ZmLTP2.5   | GRMZM2G039383    | Zm00001d036452   |                      | 6    | 89056590..89059874              | 95606693..95610394              | 96          | 8.74           | Cell membrane                      |
| ZmLTP2.6   | GRMZM2G403007    | Zm00001d037677   |                      | 6    | 133753395..133756700            | 140571718..140575248            | 94          | 9.01           | Cell membrane                      |
| ZmLTP2.7   | GRMZM2G004909    | Zm00001d038911   |                      | 6    | 166850024..166853329            | 174166937..174170679            | 101         | 8.98           | Cell membrane                      |
| ZmLTP2.8   | GRMZM2G320373    | Zm00001d038913   | ltp1                 | 6    | 166866833..166870129            | 174183772..174187444            | 101         | 8.83           | Cell membrane                      |
| ZmLTP2.9   | GRMZM2G393150    | Zm00001d011630   |                      | 8    | 156785611..156788913            | 156074621..156078392            | 98          | 9.65           | Cell membrane                      |
| Type C     |                  |                  |                      |      |                                 |                                 |             |                |                                    |
| ZmLTPc1    | AC225127.3_FG003 | Zm00001d052736   | ms44                 | 4    | 199342499..199346167            | 201189284..201192696            | 103         | 7.52           | Cell membrane                      |
| ZmLTPc2    | GRMZM2G073377    | Zm00001d021226   | nthr3                | 7    | 146555258..146559128            | 147778434..147782302            | 103         | 7.52           | Cell membrane                      |
| Type D     |                  |                  |                      |      |                                 |                                 |             |                |                                    |

|               |                 |                |       |    |                      |                      |        |       |                                     |
|---------------|-----------------|----------------|-------|----|----------------------|----------------------|--------|-------|-------------------------------------|
| ZmLTPd1       | GRMZM2G031102   | -              | -     | 1  | -                    | -                    | 111.00 | 8.49  | Cell membrane                       |
| ZmLTPd2       | GRMZM2G071771   | -              | -     | 2  | -                    | -                    | 156    | 8.50  | Cell membrane                       |
| ZmLTPd3       | GRMZM2G136364   | Zm00001d003757 | -     | 2  | 57739376..57743342   | 57628036..57631949   | 111    | 8.49  | Cell membrane                       |
| ZmLTPd4       | GRMZM2G099867   | Zm00001d004700 | -     | 2  | 132136657..132140680 | 132045819..132049539 | 115    | 6.05  | Cell membrane                       |
| ZmLTPd5       | GRMZM2G164440   | Zm00001d005146 | -     | 2  | 161021720..161025067 | 160904727..160908766 | 107    | 8.74  | Cell membrane                       |
| ZmLTPd6       | GRMZM2G087413   | Zm00001d041822 | betl9 | 3  | 139333675..139337330 | 140244639..140248303 | 106    | 8.77  | Cell membrane, Nucleus              |
| ZmLTPd7       | GRMZM2G396418   | Zm00001d042383 | -     | 3  | 164036835..164040155 | 164558045..164561365 | 118    | 9.30  | Cell membrane                       |
| ZmLTPd8       | GRMZM2G065557   | Zm00001d042862 | -     | 3  | 182289284..182293070 | 184483458..184487254 | 116    | 6.68  | Cell membrane                       |
| ZmLTPd9       | GRMZM2G094632   | Zm00001d014315 | -     | 5  | 40640614..40644780   | 40904570..40908818   | 103    | 8.72  | Cell membrane                       |
| ZmLTPd10      | AC233926.1_FG00 | Zm00001d019399 | -     | 7  | 32079614..32082925   | 32079614..32082925   | 105    | 6.68  | Cell membrane                       |
| ZmLTPd11      | GRMZM2G000221   | Zm00001d019400 | -     | 7  | 32220531..32223848   | 31964542..31968231   | 107    | 8.35  | Cell membrane                       |
| ZmLTPd12      | GRMZM2G471051   | Zm00001d012080 | -     | 8  | 167760881..167764189 | 169059891..169063740 | 100    | 8.91  | Cell membrane                       |
| ZmLTPd13      | GRMZM2G170969   | Zm00001d012081 | -     | 8  | 167764716..167768018 | 169063941..169067513 | 111    | 7.49  | Cell membrane, Cell wall            |
| ZmLTPd14-1    | GRMZM2G091054   | Zm00001d012572 | al9   | 8  | 176807113..176814509 | 178062064..178065852 | 117    | 6.00  | Cell membrane, Chloroplast, Nucleus |
| ZmLTPd14-2    |                 |                |       |    |                      | 178066088..178069542 | 91     | 8.42  | Cell membrane                       |
| ZmLTPd15      | GRMZM2G155555   | Zm00001d024958 | -     | 10 | 96866696..96870584   | 98671565..98675351   | 120    | 8.93  | Cell membrane                       |
| ZmLTPd16      | GRMZM2G063375   | Zm00001d024959 | -     | 10 | 96879402..96883182   | 98684217..98687993   | 120    | 8.93  | Cell membrane                       |
| <b>Type G</b> |                 |                |       |    |                      |                      |        |       |                                     |
| ZmLTPg1-1     | GRMZM5G850455   | Zm00001d027811 | -     | 1  | 14309986..14319956   | 14212854..14217190   | 189    | 7.46  | Cell membrane                       |
| ZmLTPg1-2     |                 | Zm00001d027812 | -     |    |                      |                      | 181    | 8.32  | Cell membrane                       |
| ZmLTPg2       | GRMZM2G174680   | Zm00001d028973 | plt4  | 1  | 53307564..53311100   | 52766145..52770357   | 181    | 8.01  | Cell membrane                       |
| ZmLTPg3       | GRMZM2G078876   | Zm00001d029365 | -     | 1  | 66856799..66862704   | 66856799..66862704   | 161    | 8.49  | Cell membrane                       |
| ZmLTPg4       | GRMZM2G083725   | Zm00001d031636 | ltpg1 | 1  | 197044858..197049701 | 199011874..199016801 | 182    | 8.89  | Cell membrane                       |
| ZmLTPg5       | GRMZM2G097137   | Zm00001d033595 | -     | 1  | 268071263..268075125 | 269848021..269851957 | 232    | 10.08 | Cell membrane                       |
| ZmLTPg6       | GRMZM2G006047   | Zm00001d034414 | -     | 1  | 292294256..292298377 | 293918516..293922882 | 216    | 6.17  | Cell membrane                       |
| ZmLTPg7       | GRMZM2G005991   | Zm00001d034415 | plt5  | 1  | 292329708..292333982 | 293953981..293958346 | 202    | 8.07  | Cell membrane                       |
| ZmLTPg8       | GRMZM2G065640   | Zm00001d034416 | -     | 1  | 292374878..292378806 | 293999142..294003829 | 278    | 9.44  | Cell membrane                       |
| ZmLTPg9       | GRMZM2G168833   | Zm00001d034513 | -     | 1  | 295270975..295276495 | 296821940..296827044 | 260    | 8.00  | Cell membrane                       |

|                 |                  |                |      |    |                      |                      |     |       |               |
|-----------------|------------------|----------------|------|----|----------------------|----------------------|-----|-------|---------------|
| <i>ZmLTPg10</i> | GRMZM2G414620    | Zm00001d003405 | -    | 2  | 43285551..43289511   | 43273688..43277906   | 160 | 8.81  | Cell membrane |
| <i>ZmLTPg11</i> | GRMZM2G151021    | Zm00001d003600 | -    | 2  | 49390793..49396018   | 49302556..49307786   | 195 | 8.53  | Cell membrane |
| <i>ZmLTPg12</i> | AC194203.3_FG002 | Zm00001d006915 | -    | 2  | 219301495..219304917 | 219280230..219284712 | 232 | 9.30  | Cell membrane |
| <i>ZmLTPg13</i> | GRMZM2G176347    | Zm00001d007832 | -    | 2  | 240515422..240519824 | 239843482..239847829 | 169 | 7.12  | Cell membrane |
| <i>ZmLTPg14</i> | GRMZM2G071575    | Zm00001d049834 | -    | 4  | 47100636..47104875   | 47397812..47402451   | 187 | 6.79  | Cell membrane |
| <i>ZmLTPg15</i> | GRMZM2G145054    | Zm00001d050904 | -    | 4  | 129473894..129477703 | 131387877..131391825 | 140 | 8.14  | Cell membrane |
| <i>ZmLTPg16</i> | GRMZM2G130454    | Zm00001d013089 | -    | 5  | 4533909..4538027     | 4714722..4718941     | 258 | 9.28  | Cell membrane |
| <i>ZmLTPg17</i> | GRMZM2G141858    | Zm00001d014513 | -    | 5  | 51112698..51118295   | 51229578..51235168   | 149 | 8.46  | Cell membrane |
| <i>ZmLTPg18</i> | GRMZM2G116167    | Zm00001d014758 | plt6 | 5  | 61806171..61810517   | 61837211..61841796   | 256 | 10.21 | Cell membrane |
| <i>ZmLTPg19</i> | GRMZM2G089400    | Zm00001d036550 | -    | 6  | 91655493..91658945   | 98774564..98779902   | 220 | 7.50  | Cell membrane |
| <i>ZmLTPg20</i> | GRMZM2G089288    | Zm00001d018915 | -    | 7  | 9191174..9195318     | 9073465..9079182     | 206 | 8.67  | Nucleus       |
| <i>ZmLTPg21</i> | GRMZM2G046750    | Zm00001d018926 | -    | 7  | 9490940..9495219     | 9373449..9377734     | 169 | 9.28  | Cell membrane |
| <i>ZmLTPg22</i> | GRMZM2G170044    | Zm00001d019100 | -    | 7  | 16650048..16655882   | 16546343..16552199   | 194 | 5.53  | Cell membrane |
| <i>ZmLTPg23</i> | GRMZM2G171597    | Zm00001d022195 | -    | 7  | 172626913..172631128 | 176124670..176129139 | 203 | 8.72  | Cell membrane |
| <i>ZmLTPg24</i> | GRMZM2G379035    | Zm00001d012535 | -    | 8  | 176257316..176261570 | 177512287..177516630 | 234 | 5.88  | Cell membrane |
| <i>ZmLTPg25</i> | GRMZM2G004466    | Zm00001d048202 | -    | 9  | 152374510..152378805 | 155697596..155702084 | 203 | 8.72  | Cell membrane |
| <i>ZmLTPg26</i> | GRMZM2G140646    | Zm00001d023683 | -    | 10 | 15303069..15309058   | 15100610..15106666   | 169 | 6.04  | Cell membrane |
| <b>Single</b>   |                  |                |      |    |                      |                      |     |       |               |
| <i>ZmLTPx1</i>  | GRMZM2G036063    | Zm00001d019628 | -    | 7  | 46877998..46882274   | 46480634..46484818   | 169 | 6.04  | Cell membrane |
| <i>ZmLTPx2</i>  | GRMZM2G166484    | Zm00001d025467 | -    | 10 | 119823627..119828159 | 121410873..121416011 | 208 | 6.48  | Cell membrane |

Notes: 1. Information of maize *LTP* genes was acquired from MaizeGDB (<https://maizegdb.org/>). 2. Theoretical pI was retrieved in <https://web.expasy.org/protparam/>. 3. The prediction of subcellular localization information was retrieved in <http://www.csbio.sjtu.edu.cn/bioinf/Cell-PLoc-2/>.

**Table S2.** GO analysis of 65 *ZmLTP* genes

| Class              | ID         | Description                                | Pvalue   | Qvalue   | Fg_num | Bg_num | Ratio | Genes                                                                                                                    |
|--------------------|------------|--------------------------------------------|----------|----------|--------|--------|-------|--------------------------------------------------------------------------------------------------------------------------|
| Biological Process | GO:0006869 | lipid transport                            | 2.89E-21 | 1.18E-19 | 11     | 128    | 0.086 | <i>ZmLTPg8, ZmLTPg12, ZmLTP1.3-1, ZmLTP1.2-2, ZmLTP2.6, ZmLTP2.7, ZmLTP2.8, ZmLTP2.9, ZmLTPg25, ZmLTP1.7, ZmLTP1.8-1</i> |
| Biological Process | GO:0010876 | lipid localization                         | 6.80E-21 | 1.39E-19 | 11     | 138    | 0.08  | <i>ZmLTPg8, ZmLTPg12, ZmLTP1.3-1, ZmLTP1.2-2, ZmLTP2.6, ZmLTP2.7, ZmLTP2.8, ZmLTP2.9, ZmLTPg25, ZmLTP1.7, ZmLTP1.8-1</i> |
| Biological Process | GO:0009627 | systemic acquired resistance               | 1.66E-11 | 2.26E-10 | 5      | 28     | 0.179 | <i>ZmLTPd3, ZmLTPd5, ZmLTPd7, ZmLTPd10, ZmLTPd11</i>                                                                     |
| Biological Process | GO:0009814 | defense response, incompatible interaction | 6.33E-11 | 6.48E-10 | 5      | 36     | 0.139 | <i>ZmLTPd3, ZmLTPd5, ZmLTPd7, ZmLTPd10, ZmLTPd11</i>                                                                     |
| Biological Process | GO:0033036 | macromolecule localization                 | 5.54E-10 | 4.55E-09 | 11     | 1349   | 0.008 | <i>ZmLTPg8, ZmLTPg12, ZmLTP1.3-1, ZmLTP1.2-2, ZmLTP2.6, ZmLTP2.7, ZmLTP2.8, ZmLTP2.9, ZmLTPg25, ZmLTP1.7, ZmLTP1.8-1</i> |
| Biological Process | GO:0071702 | organic substance transport                | 3.00E-09 | 1.78E-08 | 11     | 1581   | 0.007 | <i>ZmLTPg8, ZmLTPg12, ZmLTP1.3-1, ZmLTP1.2-2, ZmLTP2.6, ZmLTP2.7, ZmLTP2.8, ZmLTP2.9, ZmLTPg25, ZmLTP1.7, ZmLTP1.8-1</i> |
| Biological Process | GO:0006955 | immune response                            | 3.47E-09 | 1.78E-08 | 5      | 78     | 0.064 | <i>ZmLTPd3, ZmLTPd5, ZmLTPd7, ZmLTPd10, ZmLTPd11</i>                                                                     |
| Biological Process | GO:0045087 | innate immune response                     | 3.47E-09 | 1.78E-08 | 5      | 78     | 0.064 | <i>ZmLTPd3, ZmLTPd5, ZmLTPd7, ZmLTPd10, ZmLTPd11</i>                                                                     |
| Biological Process | GO:0002376 | immune system process                      | 5.71E-09 | 2.60E-08 | 5      | 86     | 0.058 | <i>ZmLTPd3, ZmLTPd5, ZmLTPd7, ZmLTPd10, ZmLTPd11</i>                                                                     |
| Biological Process | GO:0098542 | defense response to other organism         | 8.74E-07 | 3.58E-06 | 5      | 235    | 0.021 | <i>ZmLTPd3, ZmLTPd5, ZmLTPd7, ZmLTPd10, ZmLTPd11</i>                                                                     |
| Biological Process | GO:0044765 | single-organism transport                  | 1.07E-06 | 3.99E-06 | 11     | 2779   | 0.004 | <i>ZmLTPg8, ZmLTPg12, ZmLTP1.3-1, ZmLTP1.2-2, ZmLTP2.6, ZmLTP2.7, ZmLTP2.8, ZmLTP2.9, ZmLTPg25, ZmLTP1.7, ZmLTP1.8-1</i> |
| Biological Process | GO:1902578 | single-organism localization               | 1.38E-06 | 4.05E-06 | 11     | 2848   | 0.004 | <i>ZmLTPg8, ZmLTPg12, ZmLTP1.3-1, ZmLTP1.2-2, ZmLTP2.6, ZmLTP2.7, ZmLTP2.8, ZmLTP2.9, ZmLTPg25, ZmLTP1.7, ZmLTP1.8-1</i> |
| Biological Process | GO:0043207 | response to external biotic stimulus       | 1.38E-06 | 4.05E-06 | 5      | 258    | 0.019 | <i>ZmLTPd3, ZmLTPd5, ZmLTPd7, ZmLTPd10, ZmLTPd11</i>                                                                     |
| Biological Process | GO:0051707 | response to other organism                 | 1.38E-06 | 4.05E-06 | 5      | 258    | 0.019 | <i>ZmLTPd3, ZmLTPd5, ZmLTPd7, ZmLTPd10, ZmLTPd11</i>                                                                     |
| Biological Process | GO:0009607 | response to biotic stimulus                | 2.54E-06 | 6.95E-06 | 5      | 292    | 0.017 | <i>ZmLTPd3, ZmLTPd5, ZmLTPd7, ZmLTPd10, ZmLTPd11</i>                                                                     |

|                    |            |                                                 |          |          |    |       |       |                                                                                                                   |
|--------------------|------------|-------------------------------------------------|----------|----------|----|-------|-------|-------------------------------------------------------------------------------------------------------------------|
| Biological Process | GO:0006810 | transport                                       | 5.85E-06 | 1.50E-05 | 11 | 3286  | 0.003 | ZmLTPg8, ZmLTPg12, ZmLTP1.3-1, ZmLTP1.2-2, ZmLTP2.6, ZmLTP2.7, ZmLTP2.8, ZmLTP2.9, ZmLTPg25, ZmLTP1.7, ZmLTP1.8-1 |
| Biological Process | GO:0051234 | establishment of localization                   | 6.76E-06 | 1.63E-05 | 11 | 3334  | 0.003 | ZmLTPg8, ZmLTPg12, ZmLTP1.3-1, ZmLTP1.2-2, ZmLTP2.6, ZmLTP2.7, ZmLTP2.8, ZmLTP2.9, ZmLTPg25, ZmLTP1.7, ZmLTP1.8-1 |
| Biological Process | GO:0051179 | localization                                    | 9.52E-06 | 2.17E-05 | 11 | 3450  | 0.003 | ZmLTPg8, ZmLTPg12, ZmLTP1.3-1, ZmLTP1.2-2, ZmLTP2.6, ZmLTP2.7, ZmLTP2.8, ZmLTP2.9, ZmLTPg25, ZmLTP1.7, ZmLTP1.8-1 |
| Biological Process | GO:0009605 | response to external stimulus                   | 1.44E-05 | 3.10E-05 | 5  | 417   | 0.012 | ZmLTPd3, ZmLTPd5, ZmLTPd7, ZmLTPd10, ZmLTPd11                                                                     |
| Biological Process | GO:0051704 | multi-organism process                          | 2.03E-05 | 4.16E-05 | 5  | 448   | 0.011 | ZmLTPd3, ZmLTPd5, ZmLTPd7, ZmLTPd10, ZmLTPd11                                                                     |
| Biological Process | GO:0006952 | defense response                                | 4.18E-05 | 8.17E-05 | 5  | 521   | 0.01  | ZmLTPd3, ZmLTPd5, ZmLTPd7, ZmLTPd10, ZmLTPd11                                                                     |
| Biological Process | GO:0006950 | response to stress                              | 0.017361 | 0.032354 | 5  | 2003  | 0.002 | ZmLTPd3, ZmLTPd5, ZmLTPd7, ZmLTPd10, ZmLTPd11                                                                     |
| Biological Process | GO:0050896 | response to stimulus                            | 0.148288 | 0.26434  | 5  | 3615  | 0.001 | ZmLTPd3, ZmLTPd5, ZmLTPd7, ZmLTPd10, ZmLTPd11                                                                     |
| Biological Process | GO:0044699 | single-organism process                         | 0.245005 | 0.418549 | 11 | 11354 | 0.001 | ZmLTPg8, ZmLTPg12, ZmLTP1.3-1, ZmLTP1.2-2, ZmLTP2.6, ZmLTP2.7, ZmLTP2.8, ZmLTP2.9, ZmLTPg25, ZmLTP1.7, ZmLTP1.8-1 |
| Biological Process | GO:0006468 | protein phosphorylation                         | 0.801839 | 1        | 1  | 1932  | 0.001 | ZmLTP1.8-2                                                                                                        |
| Biological Process | GO:0016310 | phosphorylation                                 | 0.903279 | 1        | 1  | 2731  | 0     | ZmLTP1.8-2                                                                                                        |
| Biological Process | GO:0006796 | phosphate-containing compound metabolic process | 0.964273 | 1        | 1  | 3786  | 0     | ZmLTP1.8-2                                                                                                        |
| Biological Process | GO:0006793 | phosphorus metabolic process                    | 0.965436 | 1        | 1  | 3820  | 0     | ZmLTP1.8-2                                                                                                        |
| Biological Process | GO:0006464 | cellular protein modification process           | 0.974413 | 1        | 1  | 4126  | 0     | ZmLTP1.8-2                                                                                                        |
| Biological Process | GO:0036211 | protein modification process                    | 0.974413 | 1        | 1  | 4126  | 0     | ZmLTP1.8-2                                                                                                        |
| Biological Process | GO:0043412 | macromolecule modification                      | 0.981425 | 1        | 1  | 4446  | 0     | ZmLTP1.8-2                                                                                                        |
| Biological Process | GO:0044267 | cellular protein metabolic process              | 0.99525  | 1        | 1  | 5743  | 0     | ZmLTP1.8-2                                                                                                        |
| Biological Process | GO:0019538 | protein metabolic process                       | 0.997895 | 1        | 1  | 6469  | 0     | ZmLTP1.8-2                                                                                                        |
| Biological Process | GO:0044260 | cellular macromolecule metabolic process        | 0.999989 | 1        | 1  | 10379 | 0     | ZmLTP1.8-2                                                                                                        |

|                    |            |                                     |          |          |    |       |       |                                                                                                                                                                              |
|--------------------|------------|-------------------------------------|----------|----------|----|-------|-------|------------------------------------------------------------------------------------------------------------------------------------------------------------------------------|
| Biological Process | GO:0043170 | macromolecule metabolic process     | 0.999997 | 1        | 1  | 11287 | 0     | ZmLTP1.8-2                                                                                                                                                                   |
| Biological Process | GO:0044237 | cellular metabolic process          | 1        | 1        | 1  | 13653 | 0     | ZmLTP1.8-2                                                                                                                                                                   |
| Biological Process | GO:0044238 | primary metabolic process           | 1        | 1        | 1  | 13664 | 0     | ZmLTP1.8-2                                                                                                                                                                   |
| Biological Process | GO:0071704 | organic substance metabolic process | 1        | 1        | 1  | 14297 | 0     | ZmLTP1.8-2                                                                                                                                                                   |
| Biological Process | GO:0008152 | metabolic process                   | 1        | 1        | 1  | 16449 | 0     | ZmLTP1.8-2                                                                                                                                                                   |
| Biological Process | GO:0009987 | cellular process                    | 1        | 1        | 1  | 17455 | 0     | ZmLTP1.8-2                                                                                                                                                                   |
| Biological Process | GO:0008150 | biological_process                  | 1        | 1        | 17 | 21280 | 0.001 | ZmLTPg8, ZmLTPd3, ZmLTPd5, ZmLTPg12, ZmLTPd7, ZmLTP1.3-1, ZmLTP1.2-2, ZmLTP2.6, ZmLTP2.7, ZmLTP2.8, ZmLTPd10, ZmLTPd11, ZmLTP2.9, ZmLTPg25, ZmLTP1.7, ZmLTP1.8-1, ZmLTP1.8-2 |
| Cellular Component | GO:0016020 | membrane                            | 0.016842 | 0.101052 | 8  | 9885  | 0.001 | ZmLTPg2, ZmLTPg10, ZmLTPg13, ZmLTP1.3-1, ZmLTP1.2-2, ZmLTPg24, ZmLTP1.8-1, ZmLTP1.8-2                                                                                        |
| Cellular Component | GO:0016021 | integral component of membrane      | 0.267895 | 0.403415 | 5  | 8084  | 0.001 | ZmLTPg2, ZmLTPg10, ZmLTPg13, ZmLTPg24, ZmLTP1.8-2                                                                                                                            |
| Cellular Component | GO:0031224 | intrinsic component of membrane     | 0.280264 | 0.403415 | 5  | 8202  | 0.001 | ZmLTPg2, ZmLTPg10, ZmLTPg13, ZmLTPg24, ZmLTP1.8-2                                                                                                                            |
| Cellular Component | GO:0005576 | extracellular region                | 0.291233 | 0.403415 | 1  | 757   | 0.001 | ZmLTPc2(nthr3)                                                                                                                                                               |
| Cellular Component | GO:0044425 | membrane part                       | 0.336179 | 0.403415 | 5  | 8712  | 0.001 | ZmLTPg2, ZmLTPg10, ZmLTPg13, ZmLTPg24, ZmLTP1.8-2                                                                                                                            |
| Cellular Component | GO:0005575 | cellular_component                  | 1        | 1        | 9  | 20177 | 0     | ZmLTPg2, ZmLTPg10, ZmLTPg13, ZmLTP1.3-1, ZmLTP1.2-2, ZmLTPc2(nthr3), ZmLTPg24, ZmLTP1.8-1, ZmLTP1.8-2                                                                        |
| Molecular Function | GO:0008289 | lipid binding                       | 1.27E-22 | 4.20E-21 | 12 | 293   | 0.041 | ZmLTPg8, ZmLTPd3, ZmLTPd5, ZmLTPg12, ZmLTPd7, ZmLTP1.3-1, ZmLTP1.2-2, ZmLTPd10, ZmLTPd11, ZmLTPg25, ZmLTP1.7, ZmLTP1.8-1                                                     |
| Molecular Function | GO:0005504 | fatty acid binding                  | 2.89E-12 | 4.77E-11 | 5  | 30    | 0.167 | ZmLTPd3, ZmLTPd5, ZmLTPd7, ZmLTPd10, ZmLTPd11                                                                                                                                |
| Molecular Function | GO:0033293 | monocarboxylic acid binding         | 5.24E-11 | 5.76E-10 | 5  | 52    | 0.096 | ZmLTPd3, ZmLTPd5, ZmLTPd7, ZmLTPd10, ZmLTPd11                                                                                                                                |
| Molecular Function | GO:0031406 | carboxylic acid binding             | 2.32E-09 | 1.53E-08 | 5  | 109   | 0.046 | ZmLTPd3, ZmLTPd5, ZmLTPd7, ZmLTPd10, ZmLTPd11                                                                                                                                |
| Molecular Function | GO:0043177 | organic acid binding                | 2.32E-09 | 1.53E-08 | 5  | 109   | 0.046 | ZmLTPd3, ZmLTPd5, ZmLTPd7, ZmLTPd10, ZmLTPd11                                                                                                                                |

|                    |            |                                                |          |          |    |       |       |                                                                                                                                      |
|--------------------|------------|------------------------------------------------|----------|----------|----|-------|-------|--------------------------------------------------------------------------------------------------------------------------------------|
| Molecular Function | GO:0005488 | binding                                        | 0.004856 | 0.026708 | 13 | 15770 | 0.001 | ZmLTPg8, ZmLTPd3, ZmLTPd5, ZmLTPg12, ZmLTPd7, ZmLTP1.3-1, ZmLTP1.2-2, ZmLTPd10, ZmLTPd11, ZmLTPg25, ZmLTP1.7, ZmLTP1.8-1, ZmLTP1.8-2 |
| Molecular Function | GO:0036094 | small molecule binding                         | 0.031808 | 0.137561 | 6  | 4812  | 0.001 | ZmLTPd3, ZmLTPd5, ZmLTPd7, ZmLTPd10, ZmLTPd11, ZmLTP1.8-2                                                                            |
| Molecular Function | GO:0043168 | anion binding                                  | 0.033348 | 0.137561 | 6  | 4862  | 0.001 | ZmLTPd3, ZmLTPd5, ZmLTPd7, ZmLTPd10, ZmLTPd11, ZmLTP1.8-2                                                                            |
| Molecular Function | GO:0043167 | ion binding                                    | 0.241639 | 0.886009 | 6  | 7922  | 0.001 | ZmLTPd3, ZmLTPd5, ZmLTPd7, ZmLTPd10, ZmLTPd11, ZmLTP1.8-2                                                                            |
| Molecular Function | GO:0004672 | protein kinase activity                        | 0.636801 | 1        | 1  | 1780  | 0.001 | ZmLTP1.8-2                                                                                                                           |
| Molecular Function | GO:0016773 | phosphotransferase activity, alcohol group as  | 0.679243 | 1        | 1  | 1989  | 0.001 | ZmLTP1.8-2                                                                                                                           |
| Molecular Function | GO:0016491 | oxidoreductase activity                        | 0.682105 | 1        | 1  | 2004  | 0     | ZmLTP1.7                                                                                                                             |
| Molecular Function | GO:0016301 | kinase activity                                | 0.762899 | 1        | 1  | 2489  | 0     | ZmLTP1.8-2                                                                                                                           |
| Molecular Function | GO:0016772 | transferase activity, transferring phosphorus- | 0.808088 | 1        | 1  | 2832  | 0     | ZmLTP1.8-2                                                                                                                           |
| Molecular Function | GO:0005524 | ATP binding                                    | 0.893265 | 1        | 1  | 3755  | 0     | ZmLTP1.8-2                                                                                                                           |
| Molecular Function | GO:0032559 | adenyl ribonucleotide binding                  | 0.896885 | 1        | 1  | 3808  | 0     | ZmLTP1.8-2                                                                                                                           |
| Molecular Function | GO:0030554 | adenyl nucleotide binding                      | 0.898619 | 1        | 1  | 3834  | 0     | ZmLTP1.8-2                                                                                                                           |
| Molecular Function | GO:0035639 | purine ribonucleoside triphosphate binding     | 0.917761 | 1        | 1  | 4152  | 0     | ZmLTP1.8-2                                                                                                                           |
| Molecular Function | GO:0001883 | purine nucleoside binding                      | 0.920606 | 1        | 1  | 4205  | 0     | ZmLTP1.8-2                                                                                                                           |
| Molecular Function | GO:0032550 | purine ribonucleoside binding                  | 0.920606 | 1        | 1  | 4205  | 0     | ZmLTP1.8-2                                                                                                                           |
| Molecular Function | GO:0032555 | purine ribonucleotide binding                  | 0.920606 | 1        | 1  | 4205  | 0     | ZmLTP1.8-2                                                                                                                           |
| Molecular Function | GO:0001882 | nucleoside binding                             | 0.921238 | 1        | 1  | 4217  | 0     | ZmLTP1.8-2                                                                                                                           |
| Molecular Function | GO:0032549 | ribonucleoside binding                         | 0.921238 | 1        | 1  | 4217  | 0     | ZmLTP1.8-2                                                                                                                           |
| Molecular Function | GO:0017076 | purine nucleotide binding                      | 0.92228  | 1        | 1  | 4237  | 0     | ZmLTP1.8-2                                                                                                                           |
| Molecular Function | GO:0032553 | ribonucleotide binding                         | 0.922899 | 1        | 1  | 4249  | 0     | ZmLTP1.8-2                                                                                                                           |



|                    |            |                                 |          |   |    |       |       |                                                                                                                                      |
|--------------------|------------|---------------------------------|----------|---|----|-------|-------|--------------------------------------------------------------------------------------------------------------------------------------|
| Molecular Function | GO:0097367 | carbohydrate derivative binding | 0.924477 | 1 | 1  | 4280  | 0     | ZmLTP1.8-2                                                                                                                           |
| Molecular Function | GO:0000166 | nucleotide binding              | 0.940949 | 1 | 1  | 4645  | 0     | ZmLTP1.8-2                                                                                                                           |
| Molecular Function | GO:1901265 | nucleoside phosphate binding    | 0.940949 | 1 | 1  | 4645  | 0     | ZmLTP1.8-2                                                                                                                           |
| Molecular Function | GO:0016740 | transferase activity            | 0.979903 | 1 | 1  | 6165  | 0     | ZmLTP1.8-2                                                                                                                           |
| Molecular Function | GO:1901363 | heterocyclic compound binding   | 0.999213 | 1 | 1  | 10044 | 0     | ZmLTP1.8-2                                                                                                                           |
| Molecular Function | GO:0097159 | organic cyclic compound binding | 0.999228 | 1 | 1  | 10064 | 0     | ZmLTP1.8-2                                                                                                                           |
| Molecular Function | GO:0003824 | catalytic activity              | 0.999737 | 1 | 2  | 13695 | 0     | ZmLTP1.7, ZmLTP1.8-2                                                                                                                 |
| Molecular Function | GO:0003674 | molecular_function              | 1        | 1 | 13 | 23755 | 0.001 | ZmLTPg8, ZmLTPd3, ZmLTPd5, ZmLTPg12, ZmLTPd7, ZmLTP1.3-1, ZmLTP1.2-2, ZmLTPd10, ZmLTPd11, ZmLTPg25, ZmLTP1.7, ZmLTP1.8-1, ZmLTP1.8-2 |

Note: Qvalue, corrected-pvalue; Fg\_num, foreground gene number; Bg\_num, background genenumber; Ratio= Fg\_num / Bg\_num.

**Table S3.** Primers for qPCR analysis of maize *LTP* genes

| Primer       | Forward (5'-3')       | Reverse (5'-3')        |
|--------------|-----------------------|------------------------|
| q-anthr3     | TCAGCATCATCAACAGCCTG  | TGCCTTTTGCCCAGTGCATC   |
| q-ms44       | TGGGCATCATCAACAGCCTG  | TGCCATCCATTGCAGCACGC   |
| q-ZmLTP1.5   | ACGTTTCAGGTCCACGCTGTG | TGTTGTAGGACAGCGAGAGG   |
| q-ZmLTP1.8-1 | ATGCAGTAAAGGTTGTAAGG  | TCTGAAAGCGTTATAGAGTGAG |
| q-ZmLTP2.9   | TGCGATGTGACGCAGCTGAC  | TCGTCCTTGTACCGGCACAG   |
| q-ZmLTPd9    | AGCTAGACCTGGACAAGGTG  | TGCTCCATTCAGATTCAGCC   |
| q-ZmLTPd15   | AGATGATCCCCATGGCTGCAC | TGTCATGCAGTGCCTATCAC   |
| q-ZmLTPd16   | TGTCGTGAAGGTTGTGGATG  | TGCACCCATCCCAGCAGTTG   |
| q-ZmLTPg4    | TCTTCGCCAACGCCTCCAAG  | AGAAGAGTGACGAGGCGATC   |
| q-ZmLTPg11   | TCTACGCTTCCTGCGGAGG   | ATAACAGGAACGGTGGCGGG   |
| q-ZmLTPg14   | ACTACGCGCTGTTCGCCAAC  | AGCCTGGAGCCTGATAACGG   |
| q-ZmLTPg15   | AGCAGATGTTCAAGCTCCC   | ACCATGATGGTGCTGCTGTG   |
| q-ZmLTPg20   | AGCCGACACAGCTGCAGATG  | AGGCATACAGCAATGCGCAG   |
| q-ZmLTPg26   | ACTGCAGCATTGATCCTCGC  | AGATCAAGATCGAGCGAGGC   |
| q-ZmLTPx1    | TCACCGTTGATGCCATCGC   | AGCTGATGATGACGCACATG   |
| q-ZmLTPx2    | TCATCGCTTCCATCGACCTC  | TAGAGCGCGAGGTGGTGG     |
| ZmUbi2-RT    | CGACAACGTGAAGGCGAAGA  | ACGCAGATACCCAGGTACAGC  |
